# Supplementary material for: Association of Transferrin Gene Polymorphism with Cognitive Deficits and Psychiatric Symptoms in Patients with Chronic Schizophrenia
Source: MDPI journal article supplement (doi:10.3390/jcm11216414), 2022-10-29
Supplement: s1 [file s1]

**Supplementary Table S1** Demographic and clinical data of schizophrenia patients and healthy controls

| Variable                                                         | Schizophrenia<br>Patients | Healthy Controls | t/ $\chi^2$ (p) |
|------------------------------------------------------------------|---------------------------|------------------|-----------------|
|                                                                  | (n=564)                   | (n=422)          |                 |
| Gender (M/F)                                                     | 499/65                    | 174/248          | 250.65 (<0.001) |
| Age (years)                                                      | 47.8±9.0                  | 46.1±13.2        | -2.32 (<0.05)   |
| Education (years)                                                | 8.9±4.5                   | 9.4±5.5          | 3.49 (<0.01)    |
| Body mass index (kg/m <sup>2</sup> )                             | 24.8±3.9                  | 25.3±4.0         | 1.82 (0.07)     |
| Smokers (%)                                                      | 396/564                   | 151/422          | 133.88 (<0.001) |
| Age of onset (years)                                             | 23.2±4.8                  |                  |                 |
| Duration of illness (years)                                      | 24.6±8.7                  |                  |                 |
| Daily antipsychotic dose (mg/day)<br>(chlorpromazine equivalent) | 433.6±366.6               |                  |                 |
| PANSS scores                                                     |                           |                  |                 |
| P subscore                                                       | 11.2±4.7                  |                  |                 |
| N subscore                                                       | 22.3±7.3                  |                  |                 |
| G subscore                                                       | 24.8±5.5                  |                  |                 |
| Total score                                                      | 58.3±13.6                 |                  |                 |
