# Supplementary material for: Association of Transferrin Gene Polymorphism with Cognitive Deficits and Psychiatric Symptoms in Patients with Chronic Schizophrenia
Source: MDPI journal article supplement (doi:10.3390/jcm11216414), 2022-10-29
Supplement: s1 [file s1]

**Supplementary Table S2** Allele and genotype frequencies of rs3811655 polymorphism for schizophrenia and healthy controls.

|                                   | Genotype   |            |          | P(2df) | Allele     |            | P(1df) |
|-----------------------------------|------------|------------|----------|--------|------------|------------|--------|
|                                   | CC         | GC         | GG       |        | C          | G          |        |
| Schizophrenia patients<br>(n=564) | 350(62.1%) | 186(33.0%) | 28(5.0%) | 0.70   | 886(78.5%) | 242(21.5%) | 0.83   |
| Healthy controls<br>(n=422)       | 256(60.6%) | 148(35.1%) | 18(4.3%) |        | 660(78.2)  | 184(21.8%) |        |
